# Supplementary material for: Multiplex Detection of Seven Staphylococcal Enterotoxins Using Liquid Chromatography–Mass Spectrometry Combined with a Novel Capture Molecule
Source: MDPI journal article supplement (doi:10.3390/separations11050136), 2024-04-29
Supplement: s1 [file s1]

**Multiplex Detection of 7 Staphylococcal Enterotoxins to use liquid chromatography-mass spectrometry combined with a novel capture molecule**

Jing Lv<sup>a</sup>, Tingting Liu<sup>a</sup>, Xinyu Fang<sup>a</sup>, Songyang Han<sup>b</sup>, Lina Dong<sup>c</sup>, Jiaxin Li<sup>a</sup>,Jing Wang<sup>1</sup>,Jinglin Wang<sup>1</sup>,Shan Gao<sup>1ad\*</sup>,Kang Lin<sup>ad\*</sup>and Wenwen Xin<sup>ad\*</sup>

Table S1: Specific peptide sequence

Table S2: Peptide profile match rate of protein sequence

Table S3 Target protein information

Figure S1: Sequence diagrams of the capture molecules MHCII and MHCII-D10

Figure S2 Sequence alignment map of the SEs proteins

Figure S3 Toxin and capture molecules gel electrophoresis

Figure S4: Standard curves of 7 serotypes of toxins in 3 different substrates of MHCII and MHCII-D10 capture molecule, 1×PBS, milk and plasma were used

Table S1 Specific peptide sequence

| Peptide | sequence       | Molecular Weight[Da] | Retention time |
|---------|----------------|----------------------|----------------|
| SEA3    | QNTVPLETVK     | 1128.291             | 2.56           |
| SEA4    | NVTVQELDLQAR   | 1385.54              | 3.20           |
| SEA3R*  | QNTVPLETV      | 1136.0               | 2.56           |
| SEB2    | VLYDDNHVSAINVK | 1586.765             | 2.68           |
| SEB4    | LGNYDNVR       | 950.019              | 1.81           |
| SEB6    | VTAQELDYLTR    | 1308.454             | 3.33           |
| SEB6R*  | VTAQELDYL      | 1318.2               | 3.32           |
| SEC1    | VLYDDHYVSATK   | 1410.546             | 2.29           |
| SEC2    | TELLNEGLAK     | 1087.238             | 2.91           |
| SEC3R*  | FLAHDLIYNISD   | 1556.4               | 3.72           |
| SED4    | NVDVYPIR       | 975.112              | 2.86           |
| SED5    | LYNNDTLGGK     | 1094.189             | 1.99           |
| SED5R*  | LYNNDTLGG      | 1102.2               | 1.99           |
| SEE1    | NALSNLR        | 786.886              | 2.28           |
| SEE4    | QTTVPIDK       | 901.028              | 1.90           |
| SEE4R*  | QTTVPID        | 908.8                | 1.90           |
| SEH1    | SDEISGEK       | 863.877              | 1.01           |
| SEH3    | FATADLAQK      | 964.086              | 2.32           |
| SEH5R*  | NVTLQELDI      | 1179.8               | 3.52           |
| SEG2    | TELENTELANNYK  | 1538.631             | 2.50           |
| SEG4    | NMVTIQELDYG    | 1353.553             | 3.45           |
| SEG6    | FLNIYGDNK      | 1083.209             | 3.21           |

Table S2: Peptide profile match rate of protein sequence

| Protein        | SEA | SEB | SEC | SED | SEE | SEG | SEH |
|----------------|-----|-----|-----|-----|-----|-----|-----|
| Match coverage | 74% | 93% | 93% | 83% | 99% | 99% | 99% |

Table S3: Target protein information

| Protein               | SEA  | SEB  | SEC  | SED  | SEE  | SEG  | SEH  | MHCII | MHCIID10 |
|-----------------------|------|------|------|------|------|------|------|-------|----------|
| Molecular Weight[kDa] | 28   | 29   | 28   | 27   | 27   | 28   | 26   | 23    | 37       |
| Concentration (mg/mL) | 0.61 | 1.32 | 1.14 | 0.67 | 1.47 | 1.23 | 1.62 | 1.48  | 0.54     |
| yield (%)             | 4.17 | 8.58 | 6.84 | 5.16 | 12.7 | 14.0 | 9.72 | 8.61  | 1.62     |
| purification-fold     | 14.6 | 15.4 | 16.7 | 13.0 | 11.6 | 8.8  | 16.7 | 17.2  | 33.3     |

a)

起始密码子  
↓  
MGMSDKIIHLTDDSFDTDLKADGAILVDFWAEWCGPCKMIAPILDEIADEYQGKLTVAKLNIDQN  
NcoI Trx-tag  
PGTAPKYGIRGIPTLLLKNGEVAATKVGALSKGQLKEFLDANLAGGGGSGGGGSGGGGS  
linker  
IKEEHV I I QAEFYLNPDQSGEFMFDFDGDEI FHVDMAKKETVWRLEEFGR  
MHC  
FASFEAQGALANIAVDKANLEIMTKRSNYTP ITN HHHHHH\*  
His tag XcoI

b)

起始密码子  
↓  
MGMSDKIIHLTDDSFDTDLKADGAILVDFWAEWCGPCKMIAPILDEIADEYQGKLTVAKLNIDQNP  
NcoI Trx-tag  
GTAPKYGIRGIPTLLLKNGEVAATKVGALSKGQLKEFLDANLAGGGGSGGGGSGGGGS  
linker  
IKEEHV I I QAEFYLNPDQSGEFMFDFDGDEI FHVDMAKKETVWRLEEFGRFASFEAQ  
MHC  
GALANIAVDKANLEIMTKRSNYTP ITN GGGGSGGGGSGGGGSGAVVSQHP SMVIVKSG  
linker  
TSVKIECRSLDTNIHTMFWRQFPKQSLMLMATSHQG FNAIYEQGVVKDKFLINHAS  
TCR-D10  
PTLSTLTVTSAHPEDSGFYVCSALAGSGSSTDTQYFGPGTQLTVL HHHHHH\*  
His tag XcoI

Figure S1 Sequence diagrams of the capture molecules MHCII and MHCII-D10

a) The capture molecule MHCII sequence b) The capture molecule MHCII-D10 sequence

\* means a termination codon

```
SEA SERSEEINERIRKSEIQG..TALNLRQIYYNEKARTENKESHDQFIQHTILFRGFTDHSWYNDLIVDFDSKDIVKYGSRNIIYGAYGVCAGGTPN.....RTAGVGGTTHDNNRLTE..EKKVPIINLIDGKQN
SEB ESQPDFPDPHRSKFT...GLNEMKVIDD.CNHVSAINVKSIDQFIYFLLYSIKCTKLGNYDNVVEFKNRDLAKYKGMVYVFGANVYCCYFSKRTNDINSHQITKRRKTMMGGSEHNGNQLR..YRSITVRVFEDGRNL
SEC1 ESQPDFPDPHRSKFT...GLNEMKVIDD.CHYVSATKVSVDKFLAHLIYINISCKRLKNYDKVTELLNEGLAKYKGMVYVFGANVYCCYFSKSD...NVGKVTGGKTMMGGSEHNGNQLR..YRSITVRVFEDGRNL
SEC2 NENIDSVKEKDPHRSKFT...TALNMRHSACKNEIIGENKSTGDOFENTLLFRGFTDHSWYNDLIVDFDSKDIVKYGSRNIIYGAYGVCAGGTPN.....RTAGVGGTTHDNNRLTE..EKKVPIINLIDGKQN
SEE SEEINERIRKSEIQR..NALNLRQIYYNEKARTENKESHDQFIQHTILFRGFTDHSWYNDLIVDFDSKDIVKYGSRNIIYGAYGVCAGGTPN.....RTAGVGGTTHDNNRLTE..EKKVPIINLIDGKQN
SEG QPDFKLDPHRSKFT...GLNEMKVIDD.CHYVSATKVSVDKFLAHLIYINISCKRLKNYDKVTELLNEGLAKYKGMVYVFGANVYCCYFSKSD...NVGKVTGGKTMMGGSEHNGNQLR..YRSITVRVFEDGRNL
SEH ETRHDSKELTD..LAINVAYGON..HFKENIKSDEISGEKDLIFR...NQGDSGNDLRVKRATADLACKRNNNIIYGASFYYPGEISEN.....ISEHGGTTHN.SEKLAQ..ERVIGANVWVDGIGK
```

Figure S2 Sequence alignment map of the SEs proteins

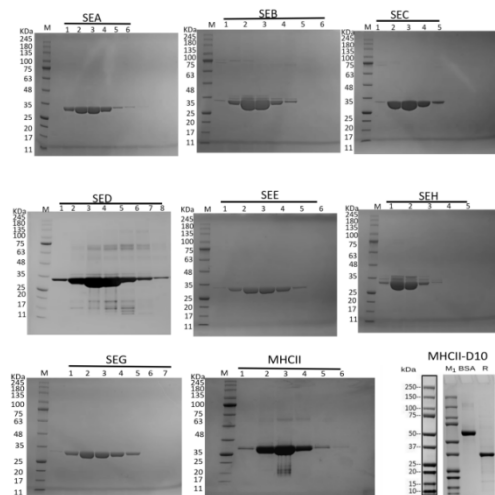

Figure S3. Toxin and capture molecule gel electrophoresis

a)

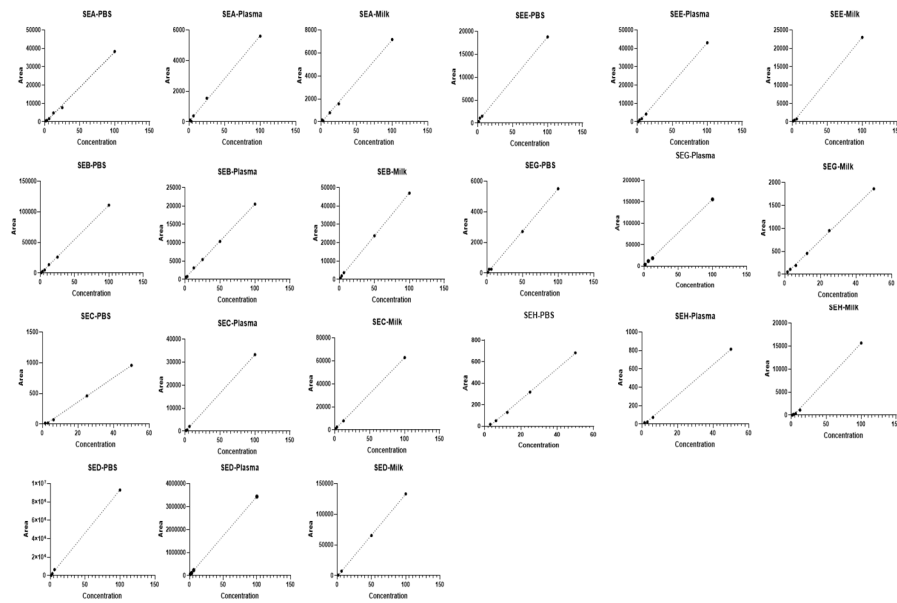

b)

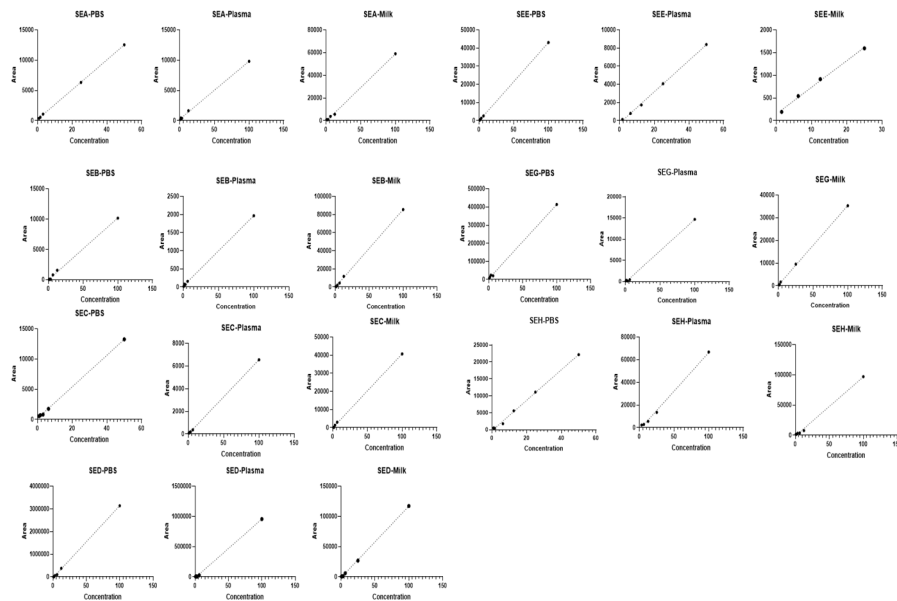

Figure S4: Standard curves of 7 serotypes of toxins in 3 different substrates of MHCII and MHCII-D10 capture molecule, 1xPBS, milk and plasma were used

**a)** Standard curves of 7 serotypes of toxins in 3 different substrates including MHCII capture molecule, 1xPBS milk and plasam were used. **b)** Standard curves of 7 serotypes of toxins in 3 different substrates including MHCII-D10 capture molecule, 1xPBS milk and plasam were used.
